# Supplementary material for: Integration of Urinary EN2 Protein & Cell-Free RNA Data in the Development of a Multivariable Risk Model for the Detection of Prostate Cancer Prior to Biopsy
Source: Cancers (Basel). 2021 Apr 27;13(9):2102. doi: 10.3390/cancers13092102 (PMC8123800; doi:10.3390/cancers13092102)
Supplement: Supplementary file 1 [file cancers-13-02102-s001.zip › cancers-1130350 supplementary.pdf]

# Integration of Urinary EN2 Protein & Cell-Free RNA Data in the Development of a Multivariable Risk Model for the Detection of Prostate Cancer Prior to Biopsy

Shea P. Connell <sup>1</sup>, Robert Mills <sup>2</sup>, Hardev Pandha <sup>3</sup>, Richard Morgan <sup>4</sup>, Colin S. Cooper <sup>1</sup>, Jeremy Clark <sup>1</sup> and Daniel S. Brewer <sup>1,5,\*</sup>; The Movember GAP1 Urine Biomarker Consortium <sup>†</sup>

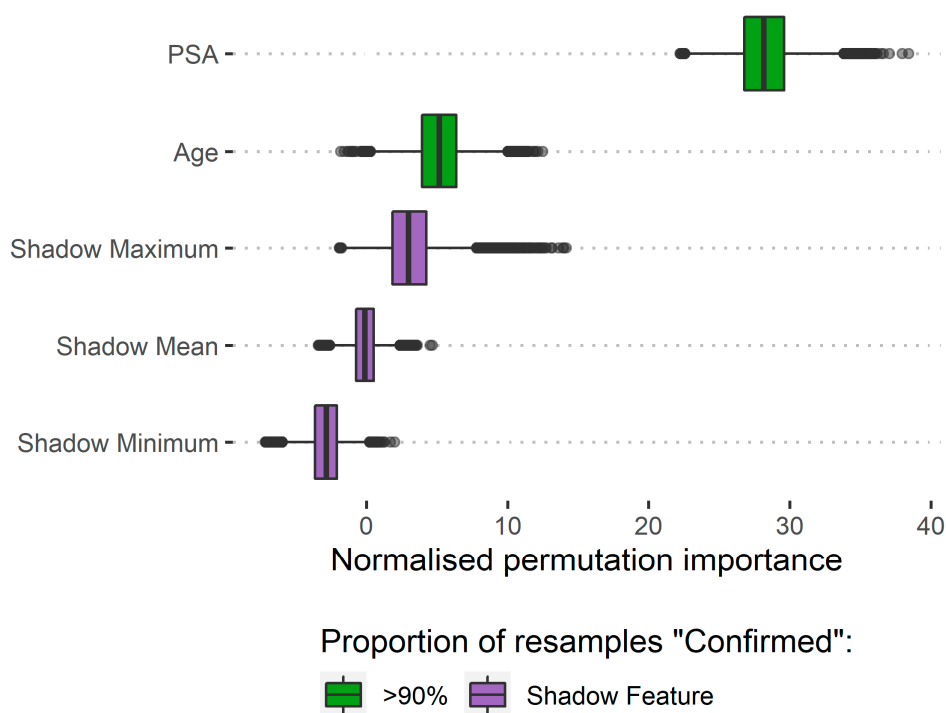

**Figure S1.** Boruta analysis of variables available for the training of the SoC model. Variable importance was determined over 1,000 bootstrap resamples of the available data and the decision reached recorded at each resample. Colour indicates the proportion of the 1,000 resamples a variable was confirmed to be important in. Variables confirmed in at least 90% of resamples were selected for training predictive models (Green).

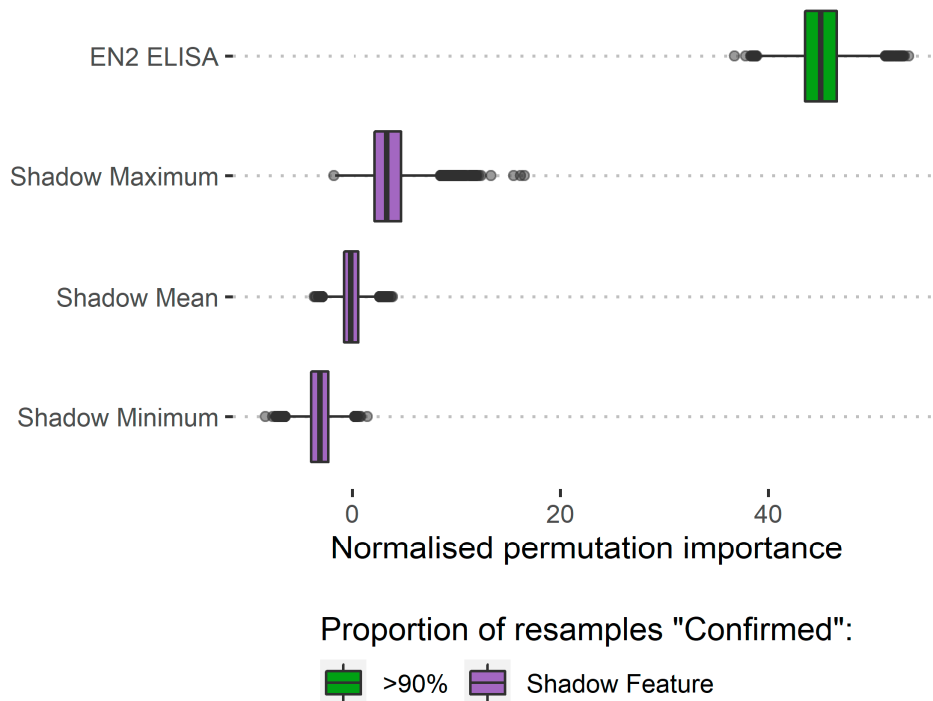

**Figure S2.** Boruta analysis of variables available for the training of the Engrailed model. Variable importance was determined over 1,000 bootstrap resamples of the available data and the decision reached recorded at each resample. Colour indicates the proportion of the 1,000 resamples a variable was confirmed to be important in. Variables confirmed in at least 90% of resamples were selected for training predictive models (Green).

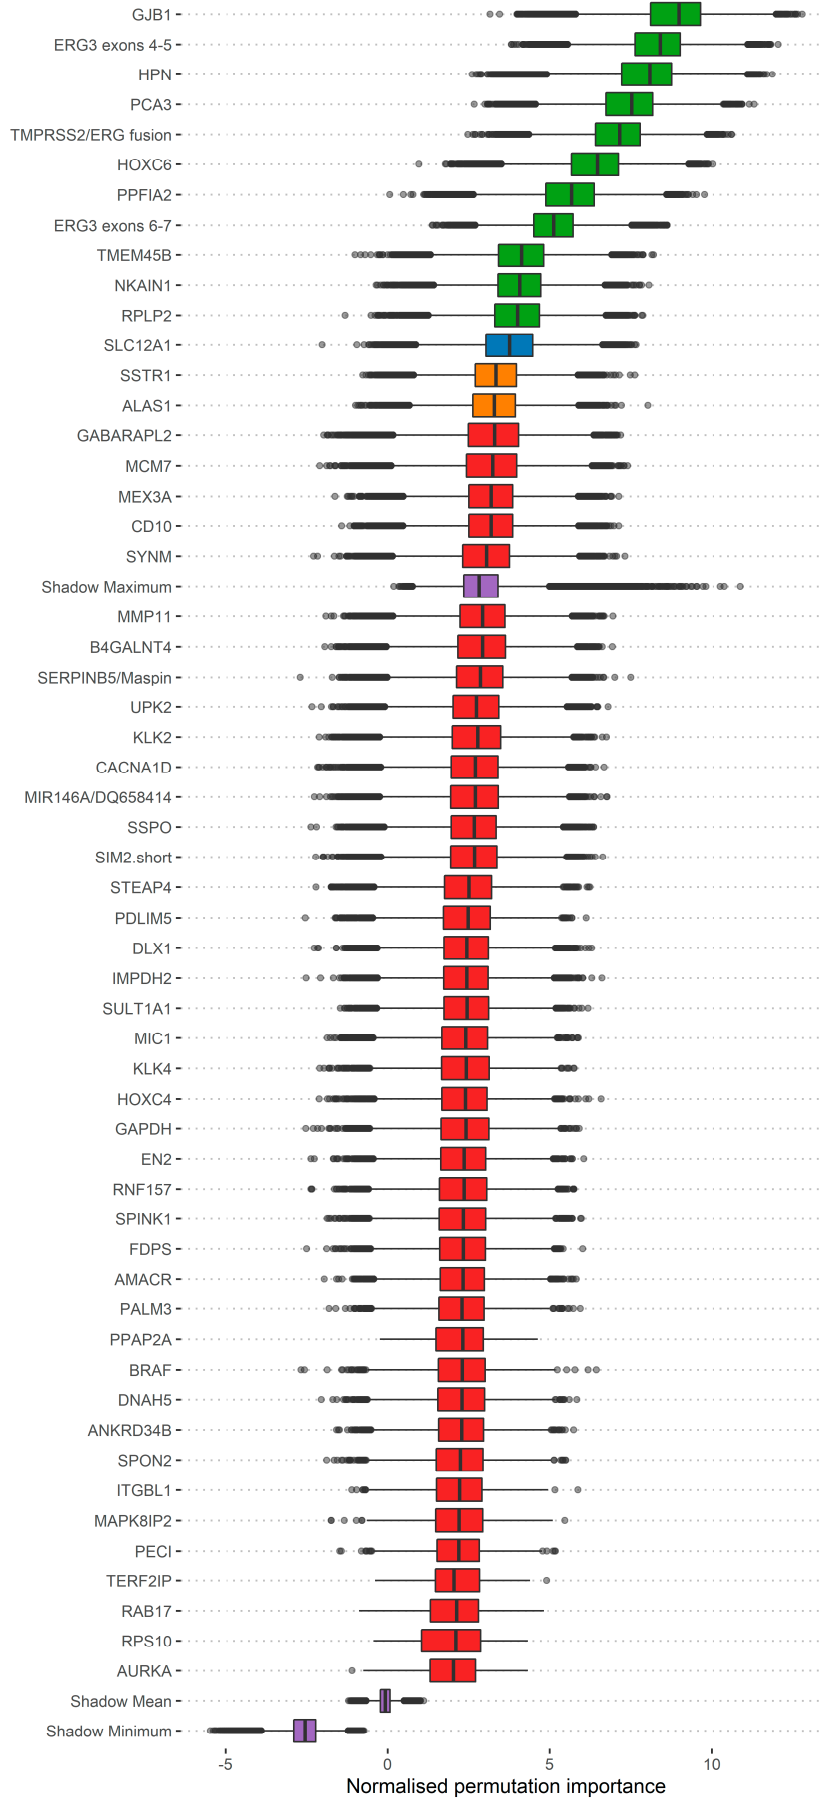

**Figure S3.** Boruta analysis of variables available for the training of the ExoRNA model. Variable importance was determined over 1,000 bootstrap resamples of the available data and the decision reached recorded at each resample. Colour indicates the proportion of the 1,000 resamples a variable was confirmed to be important in. Variables confirmed in at least 90% of resamples were selected for training predictive models. Those variables rejected in every single resample are not shown here, but the full list of inputs for the ExoRNA model can be seen in Table S1.

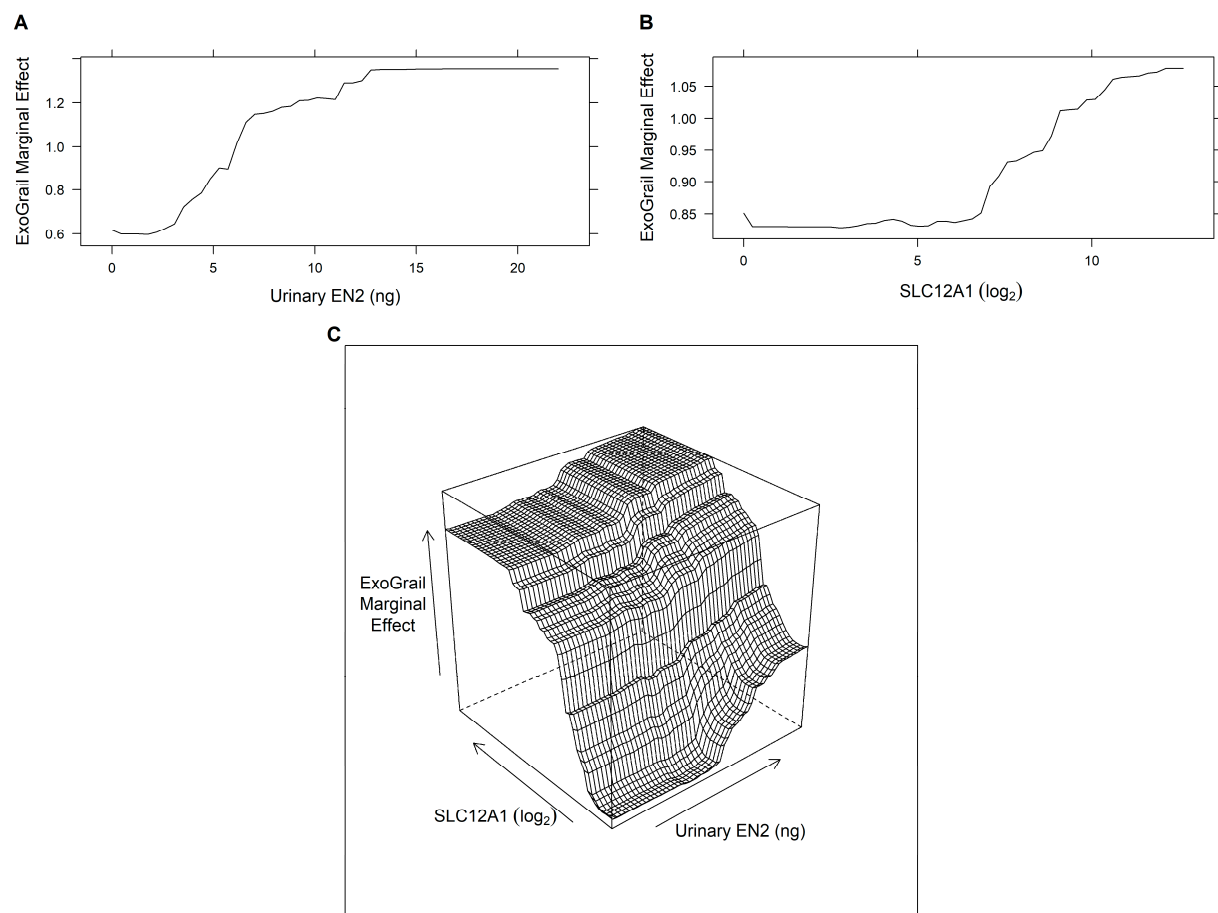

**Figure S4** Partial dependency plots detailing the marginal effects and interactions of SLC12A1 and urinary EN2 on predicted ExoGrail Risk Score. **A** - Partial dependency of ExoGrail on urinary EN2, **B** - Partial dependency of ExoGrail on SLC12A1, **C** - Partial dependency of ExoGrail on both SLC12A1 and urinary EN2.

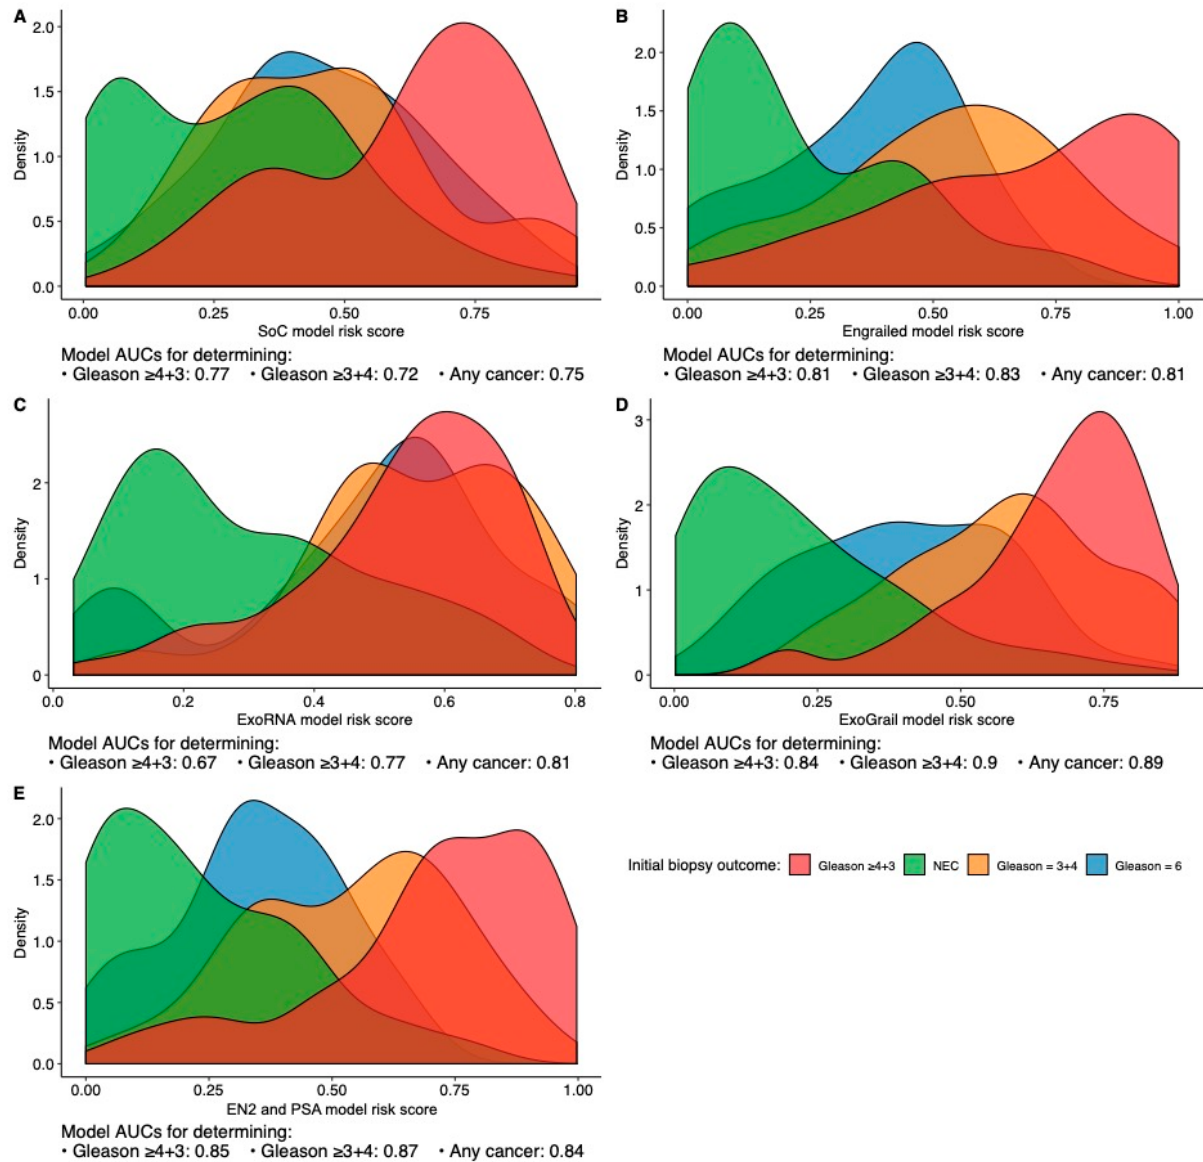

**Figure S5.** Risk score distributions of the trained models including the EN2 and PSA model, calculated as the out-of-bag predictions and represented as density plots. AUCs for each model's predictive ability for clinically relevant outcomes are detailed underneath each panel. Each random forest model was fit using differing input variables; A - SoC clinical risk model, including Age and PSA, B - Engrailed model, C -ExoRNA model and D - ExoGrail model, combining predictors from all three modes of analysis E -EN2 and PSA model. The full list of variables in each model is available in Table 1. Fill colour shows the risk score distribution of patients with respect to biopsy outcome: No evidence of cancer (Green), Gleason 6 (Blue), Gleason 3+4 (Orange), Gleason  $\geq 4+3$  (Red). Both the Engrailed model and the EN2&PSA model featured a bimodal risk score distribution in samples from men with no evidence of prostate cancer (NEC) (green density plots), falsely identifying some patients with NEC and low-grade disease as similar to those with more clinically significant G3+4 disease (orange density plots). The bimodal distribution of NEC is not a feature of the ExoGrail model and separation is improved. In the EN2+PSA model a bimodal distribution is now seen in Gleason 3+4 patients (E, orange density plot), falsely identifying some patients with high grade disease as similar to those with lower grade disease. Finally, the ExoGrail model also appears to improve delineation of the G $\geq 4+3$  patients manifesting as a more distinct peak in the red density plot of D compared to EN2 and EN2&PSA plots.

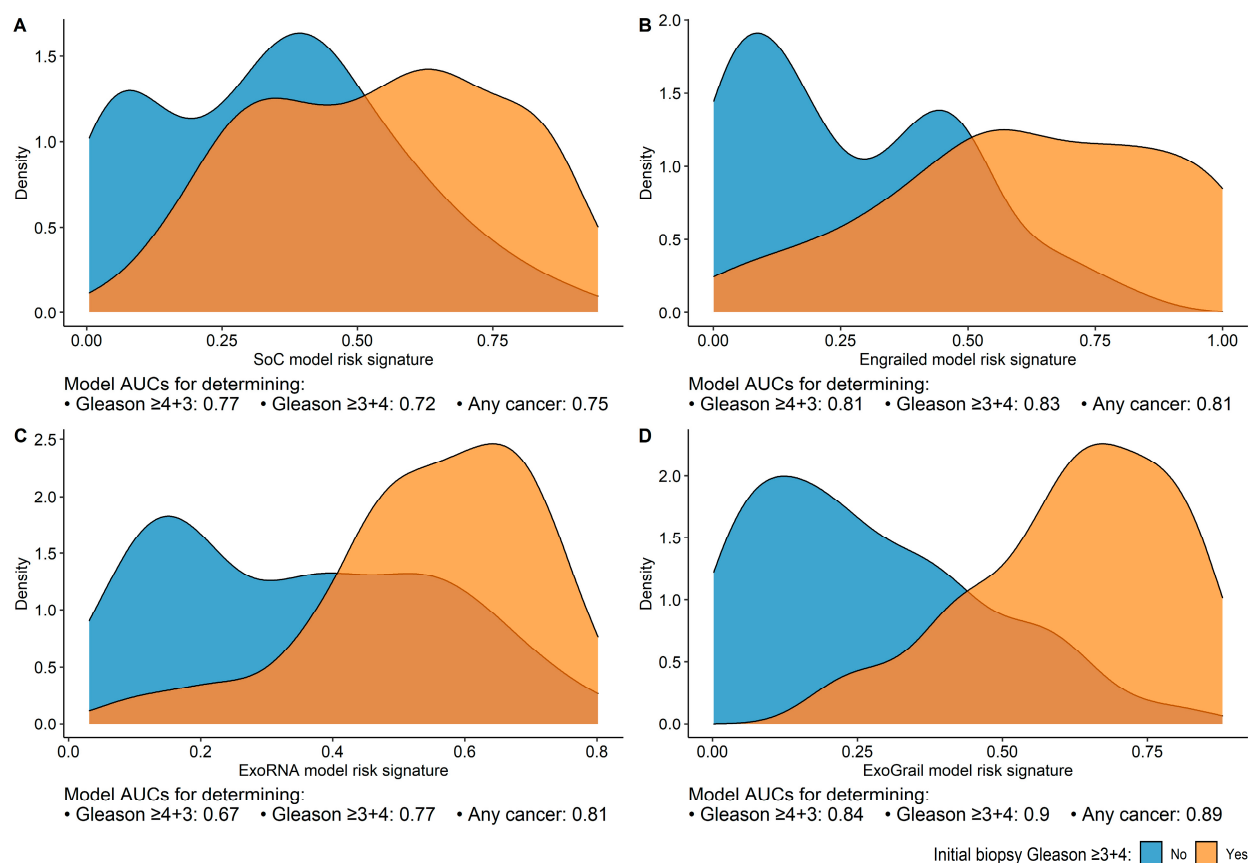

**Figure S6.** Density plots detailing risk score distributions generated from four trained models. Models A to D were trained with different input variables; **A** - SoC clinical risk model, including Age and PSA, **B** - Engrailed model, **C** -ExoRNA model and **D** - ExoGrail model, combining the predictors from all three previous models. The full list of variables in each model is available in Table 1. Fill colour shows the risk score distribution of patients with a significant biopsy outcome of Gs  $\geq 3+4$  (Orange) or Gs  $\leq 6$  (Blue)

**Table S1.** List of all features available for selection as input variables for each model prior to bootstrapped Boruta feature selection.

| SoC      | Engrailed | ExoRNA     | ExoGrail   |
|----------|-----------|------------|------------|
| PSA      | EN2 ELISA | March5     | PSA        |
| UrineVol |           | AATF       | UrineVol   |
| DRESize  |           | ABCB9      | DRESize    |
| Age      |           | ACTR5      | Age        |
|          |           | AGR2       | EN2 ELISA  |
|          |           | ALAS1      | March5     |
|          |           | AMACR      | AATF       |
|          |           | AMH        | ABCB9      |
|          |           | ANKRD34B   | ACTR5      |
|          |           | ANPEP      | AGR2       |
|          |           | APOC1      | ALAS1      |
|          |           | ARexon9    | AMACR      |
|          |           | ARexons4.8 | AMH        |
|          |           | ARHGEF25   | ANKRD34B   |
|          |           | AURKA      | ANPEP      |
|          |           | B2M        | APOC1      |
|          |           | B4GALNT4   | ARexon9    |
|          |           | BRAF       | ARexons4.8 |
|          |           | BTG2       | ARHGEF25   |
|          |           | CACNA1D    | AURKA      |
|          |           | CADPS      | B2M        |
|          |           | CAMK2N2    | B4GALNT4   |
|          |           | CAMKK2     | BRAF       |
|          |           | CASKIN1    | BTG2       |
|          |           | CCDC88B    | CACNA1D    |
|          |           | CD10       | CADPS      |
|          |           | CDC20      | CAMK2N2    |
|          |           | CDC37L1    | CAMKK2     |
|          |           | CDKN3      | CASKIN1    |

|                    |                    |
|--------------------|--------------------|
| CKAP2L             | CCDC88B            |
| CLIC2              | CD10               |
| CLU                | CDC20              |
| COL10A1            | CDC37L1            |
| COL9A2             | CDKN3              |
| CP                 | CKAP2L             |
| CTA.211A9.5.MIATNB | CLIC2              |
| DLX1               | CLU                |
| DNAH5              | COL10A1            |
| DPP4               | COL9A2             |
| EIF2D              | CP                 |
| EN2                | CTA.211A9.5.MIATNB |
| ERG3.exons.4.5     | DLX1               |
| ERG3.exons.6.7     | DNAH5              |
| ERG5               | DPP4               |
| FDPS               | EIF2D              |
| FOLH1.PSMA.NAALAD1 | EN2                |
| GABARAPL2          | ERG3.exons.4.5     |
| GAPDH              | ERG3.exons.6.7     |
| GCNT1              | ERG5               |
| GJB1               | FDPS               |
| GOLM1              | FOLH1.PSMA.NAALAD1 |
| HIST1H1C           | GABARAPL2          |
| HIST1H1E           | GAPDH              |
| HIST1H2BF          | GCNT1              |
| HIST1H2BG          | GJB1               |
| HIST32HA           | GOLM1              |
| HMBS               | HIST1H1C           |
| HOXC4              | HIST1H1E           |
| HOXC6              | HIST1H2BF          |
| HPN                | HIST1H2BG          |

|                       |                   |
|-----------------------|-------------------|
| HPRT                  | HIIST32HA         |
| IFT57                 | HMBS              |
| IGFBP3                | HOXC4             |
| IMPDH2                | HOXC6             |
| ISX                   | HPN               |
| ITGBL1                | HPRT              |
| ITPR1                 | IFT57             |
| KLK2                  | IGFBP3            |
| KLK3.PSA.exons1.2     | IMPDH2            |
| KLK3.PSA.exons2.3     | ISX               |
| KLK4                  | ITGBL1            |
| LASS1                 | ITPR1             |
| LBH                   | KLK2              |
| MAK                   | KLK3.PSA.exons1.2 |
| MAPK8IP2              | KLK3.PSA.exons2.3 |
| MCM7                  | KLK4              |
| MCTP1                 | LASS1             |
| MDK                   | LBH               |
| MED4                  | MAK               |
| MEMO1                 | MAPK8IP2          |
| Met                   | MCM7              |
| MEX3A                 | MCTP1             |
| MFSD2A                | MDK               |
| MGAT5B                | MED4              |
| MIC1                  | MEMO1             |
| MIR146A.DQ658414      | Met               |
| MIR4435.1HG.IOC541471 | MEX3A             |
| MKi67                 | MFSD2A            |
| MMP11                 | MGAT5B            |
| MMP25                 | MIC1              |
| MMP26                 | MIR146A.DQ658414  |

|                     |                       |
|---------------------|-----------------------|
| MNX1                | MIR4435.1HG.IOC541471 |
| MSMB                | MKi67                 |
| MXI1                | MMP11                 |
| MYOF                | MMP25                 |
| NAALADL2            | MMP26                 |
| NEAT1               | MNX1                  |
| NKAIN1              | MSMB                  |
| NLRP3               | MXI1                  |
| OGT                 | MYOF                  |
| OR52A2.PSGR         | NAALADL2              |
| PALM3               | NEAT1                 |
| PCA3                | NKAIN1                |
| PCSK6               | NLRP3                 |
| PDLIM5              | OGT                   |
| PECI                | OR52A2.PSGR           |
| PPAP2A              | PALM3                 |
| PPFIA2              | PCA3                  |
| PPP1R12B            | PCSK6                 |
| PSTPIP1             | PDLIM5                |
| PTN                 | PECI                  |
| PTPRC               | PPAP2A                |
| PVT1                | PPFIA2                |
| RAB17               | PPP1R12B              |
| RIOK3               | PSTPIP1               |
| RNF157              | PTN                   |
| RP11.244H18.1.P712P | PTPRC                 |
| RP11.97O12.7        | PVT1                  |
| RPL18A              | RAB17                 |
| RPL23AP53           | RIOK3                 |
| RPLP2               | RNF157                |
| RPS10               | RP11.244H18.1.P712P   |

|                 |                 |
|-----------------|-----------------|
| RPS11           | RP11.97O12.7    |
| SACM1L          | RPL18A          |
| SChLAP1         | RPL23AP53       |
| SEC61A1         | RPLP2           |
| SERPINB5.Maspin | RPS10           |
| SFRP4           | RPS11           |
| SIM2.long       | SACM1L          |
| SIM2.short      | SChLAP1         |
| SIRT1           | SEC61A1         |
| SLC12A1         | SERPINB5.Maspin |
| SLC43A1         | SFRP4           |
| SLC4A1.S        | SIM2.long       |
| SMAP1.ex.7.8    | SIM2.short      |
| SMIM1           | SIRT1           |
| SNCA            | SLC12A1         |
| SNORA20         | SLC43A1         |
| SPINK1          | SLC4A1.S        |
| SPON2           | SMAP1.ex.7.8    |
| SRSF3           | SMIM1           |
| SSPO            | SNCA            |
| SSTR1           | SNORA20         |
| ST6GALNAC1      | SPINK1          |
| STEAP2          | SPON2           |
| STEAP4          | SRSF3           |
| STOM            | SSPO            |
| SULF2           | SSTR1           |
| SULT1A1         | ST6GALNAC1      |
| SYNM            | STEAP2          |
| TBP             | STEAP4          |
| TDRD            | STOM            |
| TERF2IP         | SULF2           |

|                    |                    |
|--------------------|--------------------|
| TERT               | SULT1A1            |
| TFDP1              | SYNM               |
| Timp4              | TBP                |
| TMCC2              | TDRD               |
| TMEM45B            | TERF2IP            |
| TMEM47             | TERT               |
| TMEM86A            | TFDP1              |
| TMPRSS2.ERG.fusion | Timp4              |
| TRPM4              | TMCC2              |
| TWIST1             | TMEM45B            |
| UPK2               | TMEM47             |
| VAX2               | TMEM86A            |
| VPS13A             | TMPRSS2.ERG.fusion |
| ZNF577             | TRPM4              |
|                    | TWIST1             |
|                    | UPK2               |
|                    | VAX2               |
|                    | VPS13A             |
|                    | ZNF577             |

**Table S2.** AUC of all trained models, including a combination of EN2 and PSA, for detecting outcomes of an initial biopsy for varying clinically significant thresholds. Brackets detail 95% confidence intervals of the AUC, calculated from 1,000 stratified bootstrap resamples.

| Initial biopsy outcome: | SoC                | Engrailed          | ExoRNA             | ExoGrail           | EN2_PSA            |
|-------------------------|--------------------|--------------------|--------------------|--------------------|--------------------|
| Gleason $\geq 4+3$ :    | 0.77 (0.69 - 0.84) | 0.81 (0.73 - 0.88) | 0.67 (0.60 - 0.75) | 0.84 (0.78 - 0.89) | 0.85 (0.78 - 0.91) |
| Gleason $\geq 3+4$ :    | 0.72 (0.65 - 0.79) | 0.83 (0.77 - 0.88) | 0.77 (0.70 - 0.83) | 0.90 (0.85 - 0.94) | 0.87 (0.82 - 0.91) |
| Any Cancer              | 0.75 (0.68 - 0.82) | 0.81 (0.75 - 0.86) | 0.81 (0.75 - 0.87) | 0.89 (0.85 - 0.93) | 0.84 (0.78 - 0.89) |
